# Supplementary material for: Platelet distribution width correlates with prognosis of non-small cell lung cancer
Source: PubMed Central journal article supplement (PMC5471191; doi:10.1038/s41598-017-03772-z), 2017-06-14
Supplement: 41598_2017_3772_MOESM1_ESM.pdf [file 41598_2017_3772_MOESM1_ESM.pdf]

# Platelet distribution width correlates with prognosis of non-small cell lung cancer

running heading: PDW and prognosis in NSCLC

Ming-ming Cui<sup>1#</sup>; Na Li<sup>1#</sup>; Xing Liu<sup>2#</sup>, Zhi-yuan Yun<sup>1</sup>; Ye Niu<sup>3</sup>; Yong Zhang<sup>4</sup>; Boning Gao<sup>5</sup>; Tiemin Liu<sup>1,6</sup>; Rui-tao Wang<sup>1,\*</sup>.

<sup>1</sup>Department of Internal Medicine, Harbin Medical University Cancer Hospital, Harbin Medical University, Harbin, Heilongjiang, 150081, China

<sup>2</sup>Department of Endocrinology, Ansteel Group Hospital, AnShan, Liaoning, 114001, China

<sup>3</sup>Department of Geriatrics, the Second Affiliated Hospital, Harbin Medical University, Harbin, Heilongjiang, 150086, China

<sup>4</sup>Department of Pharmacology, Harbin Medical University, Harbin, 150081, China

<sup>5</sup>Hamon Center for Therapeutic Oncology Research, Department of Internal Medicine Pharmacology, University of Texas Southwestern Medical Center, Dallas, TX 75390, USA

<sup>6</sup>Division of Hypothalamic Research, Department of Internal Medicine, UT Southwestern Medical Center, Dallas, TX, 75390, USA

\*To whom correspondence should be addressed: Rui-tao Wang. Department of Internal Medicine, Harbin Medical University Cancer Hospital, Harbin Medical University, NO.150 Haping ST, Nangang District, Harbin, 150081, China; Tel: 86-451-86298352; Fax: 86-451-86298353; Email: [ruiwang@126.com](mailto:ruiwang@126.com).

Ming-ming Cui, Na Li, and Xing Liu contributed equally to this work.

word count: 1798; the number of figures and tables: 5

### Supplementary Table 1

**Correlation coefficient (r) for PDW in relation to WBC, neutrophil, platelet count, and MPV in NSCLC.**

|     | WBC    |       | Neutrophil |       | Platelet count |        | MPV   |       |
|-----|--------|-------|------------|-------|----------------|--------|-------|-------|
|     | r      | p     | r          | p     | r              | p      | r     | p     |
| PDW | -0.137 | 0.024 | -0.156     | 0.010 | -0.211         | <0.001 | 0.073 | 0.229 |
